# Supplementary material
Source: publisher figshare collection journal article supplement (https://gsajournals.figshare.com/articles/dataset/_/8797874)
Supplement: Supplementary file 1 [file 1]

**Table S2. Raw data of genotype tested for axotomy.**

| strain  | genotype                                               | n  | regenerated | %  | p-value | v.s.   |
|---------|--------------------------------------------------------|----|-------------|----|---------|--------|
| KU501   | wild type                                              | 62 | 48          | 77 | -       | -      |
| KU1270  | <i>sqv-3(n2842)</i>                                    | 53 | 21          | 40 | <0.0001 | KU501  |
| KU1271  | <i>sqv-3(n2842) + P<sub>sqv-3</sub>::sqv-3</i>         | 17 | 13          | 76 | 0.012   | KU1270 |
| KU1272  | <i>sqv-3(n2842) + P<sub>unc-25</sub>::sqv-3</i>        | 20 | 14          | 70 | 0.03    | KU1270 |
| KU1273  | <i>svh-11(gk819558)</i>                                | 84 | 32          | 38 | <0.0001 | KU501  |
| KU1274  | <i>svh-11(gk819558) + P<sub>unc-25</sub>::svh-11</i>   | 51 | 36          | 71 | 0.0003  | KU1273 |
| KU86    | <i>svh-11(km86)</i>                                    | 53 | 19          | 36 | <0.0001 | KU501  |
| KU1285  | <i>svh-11(km86) + P<sub>unc-25</sub>::svh-11</i>       | 51 | 34          | 67 | 0.0019  | KU86   |
| KU1285* | <i>svh-11(km86)</i> (-array)                           | 50 | 17          | 34 | 0.0014  | KU1285 |
| KU1275  | <i>sqv-1(n2819)</i>                                    | 54 | 45          | 83 | 0.49    | KU501  |
| KU1276  | <i>sqv-5(n3611)</i>                                    | 54 | 43          | 80 | 0.82    | KU501  |
| KU504   | <i>mlk-1(km19)</i>                                     | 50 | 18          | 36 | <0.0001 | KU501  |
| KU1277  | <i>svh-11(gk819558) mlk-1(km19)</i>                    | 47 | 18          | 38 | 0.84    | KU504  |
|         |                                                        |    |             |    | 1       | KU1273 |
| KU1286  | <i>svh-11(km86) mlk-1(km19)</i>                        | 55 | 23          | 42 | 0.56    | KU504  |
|         |                                                        |    |             |    | 0.72    | KU86   |
| KU1290  | <i>svh-11(km86); ddr-2(ok574)</i>                      | 58 | 22          | 38 | 0.85    | KU86   |
|         |                                                        |    |             |    | 0.32    | KU1201 |
| KU1278  | <i>svh-11(gk819558) + P<sub>mlk-1</sub>::mlk-1</i>     | 59 | 35          | 59 | 0.017   | KU1273 |
| KU1287  | <i>svh-11(km86) + P<sub>mlk-1</sub>::mlk-1</i>         | 50 | 29          | 58 | 0.03    | KU86   |
| KU1287* | <i>svh-11(km86)</i> (-array)                           | 51 | 17          | 33 | 0.017   | KU1287 |
| KU1279  | <i>svh-11(gk819558) + P<sub>unc-25</sub>::svh-2</i>    | 50 | 32          | 64 | 0.0044  | KU1273 |
| KU1288  | <i>svh-11(km86) + P<sub>unc-25</sub>::svh-2</i>        | 52 | 32          | 62 | 0.011   | KU86   |
| KU1288* | <i>svh-11(km86)</i> (-array)                           | 52 | 21          | 40 | 0.049   | KU1288 |
| KU1280  | <i>svh-11(gk819558) + P<sub>unc-25</sub>::ddr-2</i>    | 67 | 33          | 49 | 0.19    | KU1273 |
| KU1289  | <i>svh-11(km86) + P<sub>unc-25</sub>::ddr-2</i>        | 54 | 26          | 48 | 0.24    | KU86   |
| KU1201  | <i>ddr-2(ok574)</i>                                    | 56 | 16          | 29 | <0.0001 | KU501  |
| KU1203  | <i>ddr-2(ok574) + P<sub>unc-25</sub>::ddr-2</i>        | 55 | 33          | 60 | 0.0011  | KU1201 |
| KU1281  | <i>ddr-2(ok574) + P<sub>unc-25</sub>::ddr-2(N141A)</i> | 51 | 20          | 39 | 0.31    | KU1201 |
| KU1282  | <i>ddr-2(ok574) + P<sub>unc-25</sub>::ddr-2(N167A)</i> | 53 | 26          | 49 | 0.032   | KU1201 |
| KU1283  | <i>ddr-2(ok574) + P<sub>unc-25</sub>::ddr-2(N264A)</i> | 51 | 32          | 63 | 0.0005  | KU1201 |
| KU1284  | <i>ddr-2(ok574) + P<sub>unc-25</sub>::ddr-2(N353A)</i> | 52 | 34          | 65 | 0.0002  | KU1201 |

Asterisks indicate the non-transgenic sibling controls.
