# Supplementary material
Source: publisher figshare collection journal article supplement (https://gsajournals.figshare.com/articles/dataset/_/8797874)
Supplement: Supplementary file 2 [file 1]

|        |     |                                                                         |     |
|--------|-----|-------------------------------------------------------------------------|-----|
| SVH-11 | 1   | MRLFHFLKFLTINNFSRYCLKIVKVHIIWTTIICIIYFNWRFKKLDF-----MAIPYPPAVIKF        | 58  |
| FuT2   | 1   | MLVVQMPFSPFMAHFLFVFTVSTIFHVQORLAKIQAMWELPVQIPVVLASTSKALG                | 56  |
|        |     | <i>km86</i> (8 bp deletion)<br>▼PSVFYRKWVS (Stop)                       |     |
| SVH-11 | 59  | NTSAKYLSNNLASSSQLGNNIFRIASLYGLSKHLNRTLEFFIENGYHKKMDNLNRKTMPrLMEKFRILNG  | 129 |
| FuT2   | 57  | PSQLRGMWTINAI-GRLGNQMGFYATLYALAK-MNGREAF--IPAQMHSPLAPIFRITLP-----VLH    | 115 |
|        |     | <i>gk819958</i><br>↓                                                    |     |
| SVH-11 | 130 | SVPRS--TSETKFQACCLKSPISLEKNRDEYLLLSCKIYQ-----SWKYFPNMRNELIE-----        | 183 |
| FuT2   | 116 | SATASRIPWQNY-----HLNDWMEI-----EYRHIPGEIVRFTGYPCSWTFYHHLRQEIILQEFTLHDHVR | 175 |
| SVH-11 | 184 | ----FINPNTSICIFGNLISDDQNHVTCVSRRGDFVEYL----FYASDPKFMKNAVTFLNENEKVGSS    | 243 |
| FuT2   | 176 | EEAQKFLR--GLOVNSRPF----GTFVGV--VRRGDYVHVMPKVWKGVVADRRYLOQALDWFRRARY--SS | 236 |
| SVH-11 | 244 | RNRKIVLFGDDLNF----LETYFSDAHLSTVVGKNAEYYISQNPPIIDFLYSKNKCDVVLITAPRSTFGW  | 309 |
| FuT2   | 237 | LIF--VVTNSGMAWCRENIDISHSDVVFAGD-----GLEGSEAKDFALLTQCNHTIMTI----GTFGI    | 293 |
| SVH-11 | 310 | WIGYFSKGNKVYYLDIKVT--GHHIESGGLIASDYYSHWTPPKFASANSFTVVRS                 | 364 |
| FuT2   | 294 | WAAYLTGSDTIYYLAN-VTLPQSPGLKIFKPEAAFLLEWGTGIAADLSP----LLKH               | 343 |

### Figure S4. Comparison of amino acid sequences between SVH-11 and human FuT2.

Identical and similar residues are highlighted with black and gray shading, respectively. The positions of a splice site mutated in *svh-11* (*gk819958*) is indicated by an arrow. An arrowhead indicates the start position of the frameshift in the *svh-11* (*km86*) mutant.
