# Supplementary material
Source: publisher figshare collection journal article supplement (https://gsajournals.figshare.com/articles/dataset/_/8797874)
Supplement: Supplementary file 3 [file 1]

**A**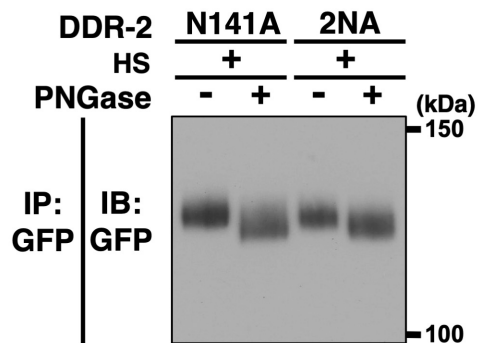**B**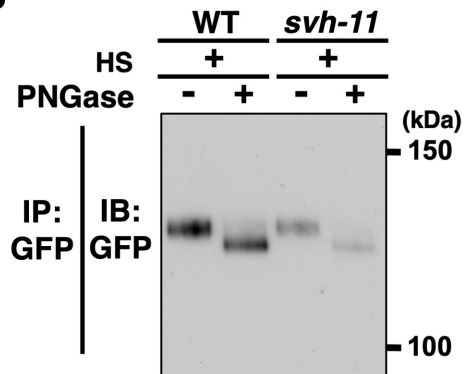**C**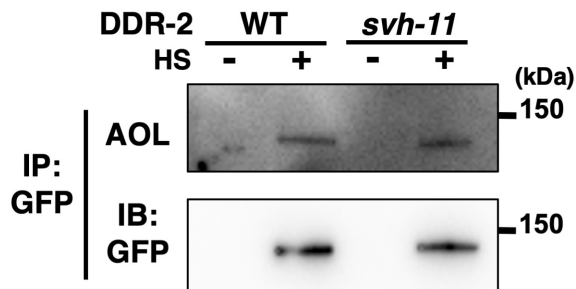

**Figure S7. N-glycosylation and fucosylation of DDR-2.**

**(A)** Effect of the *ddr-2(N141A; N167)* double mutations on DDR-2 N-glycosylation. *ddr-2(tm797)* mutants carrying *Phsp::ddr-2(N141A)::gfp* (N141A) or *Phsp::ddr-2(N141A; 167A)::gfp* (2NA) were subjected to heat shock at 37°C for 30 min and incubated at 20°C for additional 4 hr. Animal lysates were prepared and immunoprecipitated with anti-GFP antibody. The DDR-2::GFP immunoprecipitate was treated with (+) or without (-) PNGase, and immunoblotted with anti-GFP antibody.

**(B)** Effect of the *svh-1(gk819958)* mutation on DDR-2 N-glycosylation. *ddr-2(tm797)* (WT) and *svh-11(gk819958); ddr-2(tm797)* (*svh-11*) mutants carrying *Phsp::ddr-2::gfp* were subjected to heat shock at 37°C for 30 min and incubated at 20°C for additional 4 hr. Animal lysates were prepared and immunoprecipitated with anti-GFP antibody. The DDR-2::GFP immunoprecipitate was treated with (+) or without (-) PNGase, and immunoblotted with anti-GFP antibody.

**(C)** Effect of the *svh-1(km86)* mutation on DDR-2 fucosylation. *ddr-2(tm797)* (WT) and *svh-11(km86); ddr-2(tm797)* (*svh-11*) mutants carrying *Phsp::ddr-2::gfp* were subjected to heat shock at 37°C for 30 min and incubated at 20°C for additional 4 hr. Animal lysates were prepared and immunoprecipitated with anti-GFP antibody. The DDR-2::GFP immunoprecipitate was blotted with a lectin (AOL) specific for L-fucose and immunoblotted with anti-GFP antibody.
