# Supplementary material
Source: publisher figshare collection journal article supplement (https://gsajournals.figshare.com/articles/dataset/_/8797874)
Supplement: Supplementary file 4 [file 1]

|         |     |                                                                        |     |
|---------|-----|------------------------------------------------------------------------|-----|
| NSTP-1  | 1   | MAAVISTTLFGVGCQAGIEYIQTYVKNSLNLIITFASFIFITATYGLIFHSKFFTPNRIPIKSYAKI    | 68  |
| SLC35B4 | 1   | MRPALAVGLVFAGCCSNVIFLELLARKHPGCGNIVTFAQELFIAVEGFLFEADLGRKPPAIPIRYYAIM  | 69  |
|         |     |                                                                        |     |
| NSTP-1  | 69  | VAIFFTVNMTNNLALKFATYFPLFIIFKSGTILTNMTMGWILRNYQVSLKQISAVVVVVTAGIVIFTLAS | 137 |
| SLC35B4 | 70  | VTMFFTVSVVNNYALNLIAMPLHMIERSGSLIANMILGIIILKKRYSIFKYTSIALVSVGIFICTFMS   | 138 |
|         |     |                                                                        |     |
| NSTP-1  | 138 | YEPGAQNIRSGIDSNSWLIPIPPFVVGALLSFALILSAYLGLYOETFYQKHGKHNEEMMFYVHFLSIP   | 206 |
| SLC35B4 | 139 | AKQVTSQ--SSLSENDGFQAFVWLLGIGALTFALLMSARMGIFOETLYKRFGKHSKEALFYNHALPLP   | 205 |
|         |     |                                                                        |     |
| NSTP-1  | 207 | LEAFVGDDMVPAFHAAYSTPS--FVLAGLDTVVESAWVYIFAICLFOFACTKGVYMLSAVTTSLNVTMV  | 273 |
| SLC35B4 | 206 | GFVFLASDIYD--HAVLFNKSELYEIPVIGVTLHIMFYLLMNIITOYVCIRGVFILTTECASLTVTLV   | 272 |
|         |     |                                                                        |     |
| NSTP-1  | 274 | LTLRKFFSLIISFIVTEVVENMFHIIIGAAVFIGTILFSVSFARF                          | 318 |
| SLC35B4 | 273 | VTLRKFFVSLIFSILYEQNPETLWHWLGTLFVFIGTLMYTEVWNNLGTTKSEPQKDSKKN           | 331 |

**Figure S2. Comparison of amino acid sequences between SVH-9/NSTP-1 and human SLC35B4.** Identical and similar residues are highlighted with black and gray shading, respectively.
