# Supplementary material
Source: publisher figshare collection journal article supplement (https://gsajournals.figshare.com/articles/dataset/_/8797874)
Supplement: Supplementary file 5 [file 1]

**A**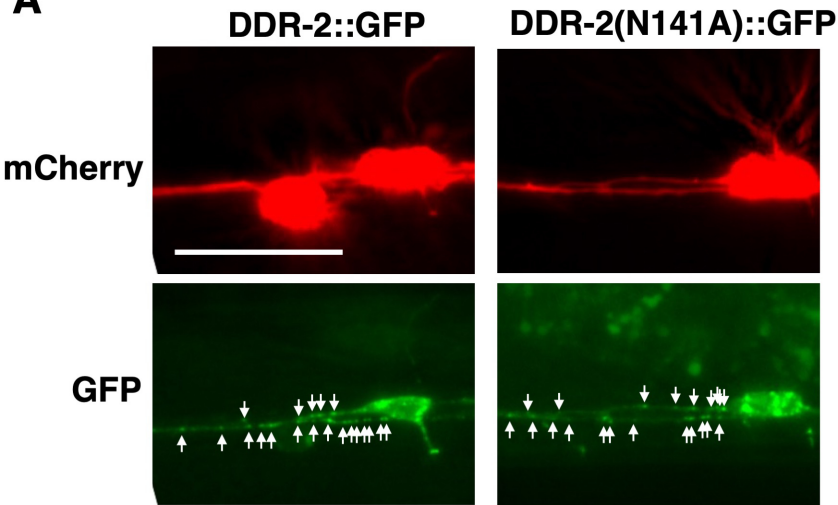**B**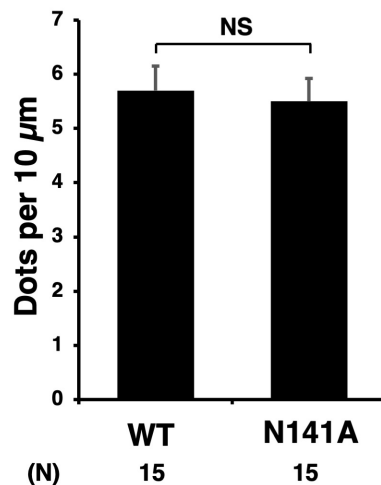

### Figure S8. Localization of DDR-2::GFP in animals.

**(A)** Fluorescent images of D-type motor neurons in wild-type animals carrying *Punc-25::ddr-2::gfp* or *Punc-25::ddr-2(N141A)::gfp* are shown. D neurons are visualized by mCherry under the control of the *unc-47* promoter. Arrows indicate punctate localization of DDR-2::GFP in D-type motor axons. Scale bar = 20  $\mu\text{m}$ .

**(B)** Quantification of the relative fluorescence levels of DDR-2::GFP on D neurons. The relative fluorescent intensities of axons in animals carrying *Punc-25::ddr-2::gfp* or *Punc-25::ddr-2(N141A)::gfp* were compared. “N” = number of axons. Error bars indicate 95% CI. NS: not significant.
