# Supplementary material
Source: publisher figshare collection journal article supplement (https://gsajournals.figshare.com/articles/dataset/_/8797874)
Supplement: Supplementary file 6 [file 1]

**Table S1. Strains used in this study.**

| Strain | Genotype                                                                                                         |
|--------|------------------------------------------------------------------------------------------------------------------|
| KU86   | <i>juls76 ll; svh-11(km86) V</i>                                                                                 |
| KU501  | <i>juls76 ll</i>                                                                                                 |
| KU504  | <i>juls76 ll; mlk-1(km19) V</i>                                                                                  |
| KU1201 | <i>juls76 ll; ddr-2(ok574) X</i>                                                                                 |
| KU1203 | <i>juls76 ll; ddr-2(ok574) X; kmEx1202[P<sub>unc-25</sub>::ddr-2]</i>                                            |
| KU1270 | <i>sqv-3(n2842) III /hT2[bli-4(e937) let(q782) qls48](I;III); juls76 ll</i>                                      |
| KU1271 | <i>sqv-3(n2842) III /hT2[bli-4(e937) let(q782) qls48](I;III); juls76 ll; kmEx1271[P<sub>sqv-3</sub>::sqv-3]</i>  |
| KU1272 | <i>sqv-3(n2842) III /hT2[bli-4(e937) let(q782) qls48](I;III); juls76 ll; kmEx1272[P<sub>unc-25</sub>::sqv-3]</i> |
| KU1273 | <i>juls76 ll; svh-11(gk819558) V</i>                                                                             |
| KU1274 | <i>juls76 ll; svh-11(gk819558) V; kmEx1274 [P<sub>unc-25</sub>::svh-11]</i>                                      |
| KU1275 | <i>juls76 ll; unc-24(e138) sqv-1(n2819) IV/hT1[qls51] (IV;V)</i>                                                 |
| KU1276 | <i>sqv-5(n3611) I /hT2[bli-4(e937) let(q782) qls48](I;III); juls76 ll</i>                                        |
| KU1277 | <i>juls76 ll; svh-11(gk819558) mlk-1(km19) V</i>                                                                 |
| KU1278 | <i>juls76 ll; svh-11(gk819558) V; kmEx507 [P<sub>mlk-1</sub>::mlk-1]</i>                                         |
| KU1279 | <i>juls76 ll; svh-11(gk819558) V; kmEx1206 [P<sub>unc-25</sub>::svh-2]</i>                                       |
| KU1280 | <i>juls76 ll; svh-11(gk819558) V; kmEx1202 [P<sub>unc-25</sub>::ddr-2]</i>                                       |
| KU1281 | <i>juls76 ll; ddr-2(ok574) X; kmEx1281[P<sub>unc-25</sub>::ddr-2(N141A)]</i>                                     |
| KU1282 | <i>juls76 ll; ddr-2(ok574) X; kmEx1282[P<sub>unc-25</sub>::ddr-2(N167A)]</i>                                     |
| KU1283 | <i>juls76 ll; ddr-2(ok574) X; kmEx1283[P<sub>unc-25</sub>::ddr-2(N264A)]</i>                                     |
| KU1284 | <i>juls76 ll; ddr-2(ok574) X; kmEx1284[P<sub>unc-25</sub>::ddr-2(N353A)]</i>                                     |
| KU1285 | <i>juls76 ll; svh-11(km86) V; kmEx1274 [P<sub>unc-25</sub>::svh-11]</i>                                          |
| KU1286 | <i>juls76 ll; svh-11(km86) mlk-1(km19) V</i>                                                                     |
| KU1287 | <i>juls76 ll; svh-11(km86) V; ; kmEx1287 [P<sub>mlk-1</sub>::mlk-1]</i>                                          |
| KU1288 | <i>juls76 ll; svh-11(km86) V; kmEx1206 [P<sub>unc-25</sub>::svh-2]</i>                                           |
| KU1289 | <i>juls76 ll; svh-11(km86) V; kmEx1202 [P<sub>unc-25</sub>::ddr-2]</i>                                           |
| KU1290 | <i>juls76 ll; svh-11(km86)V; ddr-2(ok574) X</i>                                                                  |
| KU1291 | <i>wpls36 l; kmEx1291[P<sub>unc-25</sub>::ddr-2::gfp]</i>                                                        |
| KU1292 | <i>wpls36 l; kmEx1292[P<sub>unc-25</sub>::ddr-2(N141A)::gfp]</i>                                                 |
| KU1293 | <i>wpls36 l; kmEx1293[P<sub>hsp</sub>::ddr-2::gfp]</i>                                                           |
| KU1294 | <i>wpls36 l; kmEx1294[P<sub>hsp</sub>::ddr-2(N141A)::gfp]</i>                                                    |
| KU1295 | <i>ddr-2(tm797) X; kmEx1295[P<sub>hsp</sub>::ddr-2::gfp]</i>                                                     |
| KU1296 | <i>svh-11(gk819558) V; ddr-2(tm797) X; kmEx1295[P<sub>hsp</sub>::ddr-2::gfp]</i>                                 |
| KU1297 | <i>svh-11(km86) V; ddr-2(tm797) X; kmEx1295[P<sub>hsp</sub>::ddr-2::gfp]</i>                                     |
| KU1298 | <i>ddr-2(tm797) X; kmEx1298[P<sub>hsp</sub>::ddr-2(N141A)::gfp]</i>                                              |
| KU1299 | <i>ddr-2(tm797) X; kmEx1299[P<sub>hsp</sub>::ddr-2(K554E)::gfp]</i>                                              |
| KU1300 | <i>ddr-2(tm797) X; kmEx1300[P<sub>hsp</sub>::ddr-2(N141A; N167A)::gfp]</i>                                       |
