# Supplementary material
Source: publisher figshare collection journal article supplement (https://gsajournals.figshare.com/articles/dataset/_/8797874)
Supplement: Supplementary file 7 [file 1]

|       |     |       |                                                                       |     |
|-------|-----|-------|-----------------------------------------------------------------------|-----|
| SQV-3 | 1   |       | MKIKTRLILSGTILISLAACYFLVLLVLDLEITRDLMTDYVDPRLQT                       | 48  |
| GalT1 | 1   |       | MFPSRRKAAQLPWEDGRSGLLSGGLPRKCSVFHLFVACLSLGFSLWLQLSCSGDVARAVRGQGQETS   | 70  |
| SQV-3 | 49  | ----- | SYHKLCVIVPYRDRLEELREFSPHMSKFLHNQVSSHILIIINQTDPLRFN                    | 98  |
| GalT1 | 71  |       | PPRACPPEPPPEHWEEASWGPRLAVLVPFRERFEELLVFVPHMRRFLSRKKIRHHIYVLNQLDHFNFN  | 140 |
| SQV-3 | 99  |       | RASLINVGWNEADRLGCDYVMVNDVDLLPVNPEVPYDFPGIEVIRHITSPQYHKVHYEKFIGGILMRTL | 168 |
| GalT1 | 141 |       | RAALINVGFLSSN-STDYIAMHDVDLLPLNEELDYGFPEAPF-HVASPELHPLVHYKTYVGGILLLSK  | 208 |
|       |     |       | *                                                                     |     |
| SQV-3 | 169 |       | KDYKKLNGMSNKYWGWGLEDDFYLRIDSKLNLTRVSGLSIDSSNTRFHINGFK-RKRDYTPKNDKNO   | 237 |
| GalT1 | 209 |       | QHYRLCNGMSNRFWGWGREDDFYRRIKGAGLQLFPSGITI-GYKTRHLDFAWRKRD--QRIAAQA     | 275 |
| SQV-3 | 238 |       | WEIKRKRDHVSGLHDVRYLIDSRQLLDFSGTSTVITIIINVAHCDLNWTPYCK-S               | 289 |
| GalT1 | 276 |       | QEQF-KVDREGGLNTVKYHVASRTALSVGGAPCTVLNIMLDCDKTATPWCTFS                 | 327 |

**Figure S3. Comparison of amino acid sequences between SVH-10/SQV-3 and human GalT1.** Identical and similar residues are highlighted with black and gray shading, respectively. A mutation site of *sqv-3*(*n2842*) is indicated by an asterisk.
