# Supplementary material
Source: publisher figshare collection journal article supplement (https://gsajournals.figshare.com/articles/dataset/_/8797874)
Supplement: Supplementary file 8 [file 1]

wild type

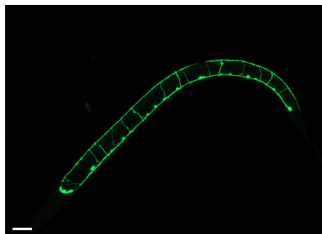

*sqv-3*

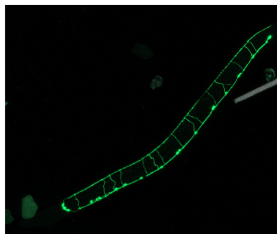

*svh-11*

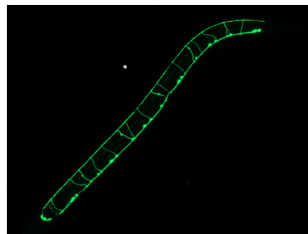

*sqv-5*

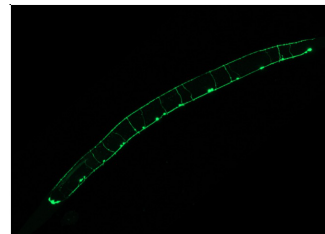

**Figure S5. Morphology of D-type motor neurons.**

Fluorescent images of D-type motor neurons in wild-type, *sqv-3*(*n2842*), *svh-11*(*gk819958*) and *sqv-5*(*n3611*) animals carrying *Punc-25::gfp* are shown. D neurons are visualized by GFP under the control of the *unc-25* promoter. Scale bar = 50  $\mu$ m.
