# Supplementary material
Source: publisher figshare collection journal article supplement (https://gsajournals.figshare.com/articles/dataset/_/8797874)
Supplement: Supplementary file 10 [file 1]

**wild type**

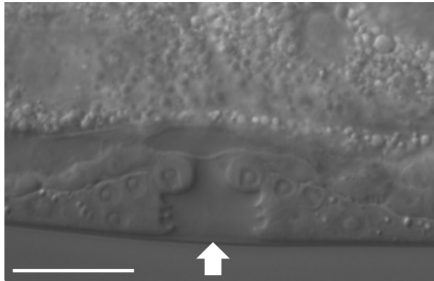

***svh-11***

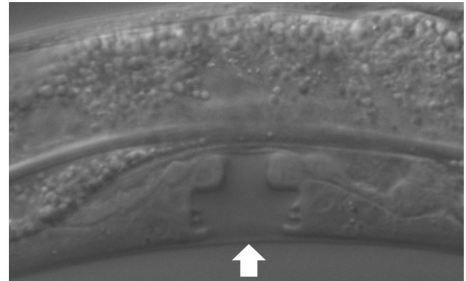

**Figure S6. Morphology of vulva.**

Morphologies of vulva in wild-type and *svh-11(gk819958)* mutant animals are shown. Vulva morphologies were observed at L4 stage. Arrows indicate the positions of vulvae. Scale bar = 50  $\mu$ m.
